# Supplementary material for: Metabolite variations in the sera of HIV+ patients after an oral administration of effervescent glutamine and in comparison to non-HIV individuals by NMR
Source: Royal Society of Chemistry journal article supplement (doi:10.1039/d2mo00097k), 2022-09-10
Supplement: d2mo00097k1.zip [file d2mo00097k1.zip]

## Sheet: Planilha1
NMR folder	NMR sample ID	Sample description	NMR experiment	Sample class	Sample ID
1pre1	3	Blood serum	1H CPMG	HIV patient before treatment (BT)	1pre1
2pre1	3	Blood serum	1H CPMG	HIV patient before treatment (BT)	2pre1
4pre1	3	Blood serum	1H CPMG	HIV patient before treatment (BT)	4pre1
6pre1	3	Blood serum	1H CPMG	HIV patient before treatment (BT)	6pre1
8pre1	3	Blood serum	1H CPMG	HIV patient before treatment (BT)	8pre1
9pre1	3	Blood serum	1H CPMG	HIV patient before treatment (BT)	9pre1
10pre1	3	Blood serum	1H CPMG	HIV patient before treatment (BT)	10pre1
12pre1	3	Blood serum	1H CPMG	HIV patient before treatment (BT)	12pre1
13pre1	3	Blood serum	1H CPMG	HIV patient before treatment (BT)	13pre1
16pre1	3	Blood serum	1H CPMG	HIV patient before treatment (BT)	16pre1
14pre1	3	Blood serum	1H CPMG	HIV patient before treatment (BT)	14pre1
17pre1	3	Blood serum	1H CPMG	HIV patient before treatment (BT)	17pre1
2pre2	3	Blood serum	1H CPMG	HIV patient before treatment (BT)	2pre2
4pre2	3	Blood serum	1H CPMG	HIV patient before treatment (BT)	4pre2
6pre2	3	Blood serum	1H CPMG	HIV patient before treatment (BT)	6pre2
8pre2	3	Blood serum	1H CPMG	HIV patient before treatment (BT)	8pre2
9pre2	3	Blood serum	1H CPMG	HIV patient before treatment (BT)	9pre2
10pre2	3	Blood serum	1H CPMG	HIV patient before treatment (BT)	10pre2
12pre2	3	Blood serum	1H CPMG	HIV patient before treatment (BT)	12pre2
13pre2	3	Blood serum	1H CPMG	HIV patient before treatment (BT)	13pre2
14pre2	3	Blood serum	1H CPMG	HIV patient before treatment (BT)	14pre2
15pre2	3	Blood serum	1H CPMG	HIV patient before treatment (BT)	15pre2
16pre2	3	Blood serum	1H CPMG	HIV patient before treatment (BT)	16pre2
17pre2	3	Blood serum	1H CPMG	HIV patient before treatment (BT)	17pre2
1pos1	3	Blood serum	1H CPMG	HIV patient after treatment (AT)	1pos1
2pos1	3	Blood serum	1H CPMG	HIV patient after treatment (AT)	2pos1
4pos1	3	Blood serum	1H CPMG	HIV patient after treatment (AT)	4pos1
6pos1	3	Blood serum	1H CPMG	HIV patient after treatment (AT)	6pos1
8pos1	3	Blood serum	1H CPMG	HIV patient after treatment (AT)	8pos1
9pos1	3	Blood serum	1H CPMG	HIV patient after treatment (AT)	9pos1
10pos1	3	Blood serum	1H CPMG	HIV patient after treatment (AT)	10pos1
12pos1	3	Blood serum	1H CPMG	HIV patient after treatment (AT)	12pos1
13pos1	3	Blood serum	1H CPMG	HIV patient after treatment (AT)	13pos1
14pos1	3	Blood serum	1H CPMG	HIV patient after treatment (AT)	14pos1
15pos1	3	Blood serum	1H CPMG	HIV patient after treatment (AT)	15pos1
17pos1	3	Blood serum	1H CPMG	HIV patient after treatment (AT)	17pos1
1pos2	3	Blood serum	1H CPMG	HIV patient after treatment (AT)	1pos2
4pos2	3	Blood serum	1H CPMG	HIV patient after treatment (AT)	4pos2
6pos2	3	Blood serum	1H CPMG	HIV patient after treatment (AT)	6pos2
8pos2	3	Blood serum	1H CPMG	HIV patient after treatment (AT)	8pos2
10pos2	3	Blood serum	1H CPMG	HIV patient after treatment (AT)	10pos2
12pos2	3	Blood serum	1H CPMG	HIV patient after treatment (AT)	12pos2
13pos2	3	Blood serum	1H CPMG	HIV patient after treatment (AT)	13pos2
14pos2	3	Blood serum	1H CPMG	HIV patient after treatment (AT)	14pos2
15pos2	3	Blood serum	1H CPMG	HIV patient after treatment (AT)	15pos2
16pos2	3	Blood serum	1H CPMG	HIV patient after treatment (AT)	16pos2
17pos2	3	Blood serum	1H CPMG	HIV patient after treatment (AT)	17pos2
1pre1	2	Blood serum	1H WATERGATE	HIV patient before treatment (BT)	1pre1
2pre1	2	Blood serum	1H WATERGATE	HIV patient before treatment (BT)	2pre1
4pre1	2	Blood serum	1H WATERGATE	HIV patient before treatment (BT)	4pre1
6pre1	2	Blood serum	1H WATERGATE	HIV patient before treatment (BT)	6pre1
8pre1	2	Blood serum	1H WATERGATE	HIV patient before treatment (BT)	8pre1
9pre1	2	Blood serum	1H WATERGATE	HIV patient before treatment (BT)	9pre1
10pre1	2	Blood serum	1H WATERGATE	HIV patient before treatment (BT)	10pre1
12pre1	2	Blood serum	1H WATERGATE	HIV patient before treatment (BT)	12pre1
13pre1	2	Blood serum	1H WATERGATE	HIV patient before treatment (BT)	13pre1
14pre1	2	Blood serum	1H WATERGATE	HIV patient before treatment (BT)	14pre1
16pre1	2	Blood serum	1H WATERGATE	HIV patient before treatment (BT)	16pre1
17pre1	2	Blood serum	1H WATERGATE	HIV patient before treatment (BT)	17pre1
1pre2	2	Blood serum	1H WATERGATE	HIV patient before treatment (BT)	1pre2
2pre2	2	Blood serum	1H WATERGATE	HIV patient before treatment (BT)	2pre2
4pre2	2	Blood serum	1H WATERGATE	HIV patient before treatment (BT)	4pre2
6pre2	2	Blood serum	1H WATERGATE	HIV patient before treatment (BT)	6pre2
8pre2	2	Blood serum	1H WATERGATE	HIV patient before treatment (BT)	8pre2
9pre2	2	Blood serum	1H WATERGATE	HIV patient before treatment (BT)	9pre2
10pre2	2	Blood serum	1H WATERGATE	HIV patient before treatment (BT)	10pre2
12pre2	2	Blood serum	1H WATERGATE	HIV patient before treatment (BT)	12pre2
13pre2	2	Blood serum	1H WATERGATE	HIV patient before treatment (BT)	13pre2
14pre2	2	Blood serum	1H WATERGATE	HIV patient before treatment (BT)	14pre2
15pre2	2	Blood serum	1H WATERGATE	HIV patient before treatment (BT)	15pre2
16pre2	2	Blood serum	1H WATERGATE	HIV patient before treatment (BT)	16pre2
17pre2	2	Blood serum	1H WATERGATE	HIV patient before treatment (BT)	17pre2
1pos1	2	Blood serum	1H WATERGATE	HIV patient after treatment (AT)	1pos1
2pos1	2	Blood serum	1H WATERGATE	HIV patient after treatment (AT)	2pos1
4pos1	2	Blood serum	1H WATERGATE	HIV patient after treatment (AT)	4pos1
6pos1	2	Blood serum	1H WATERGATE	HIV patient after treatment (AT)	6pos1
8pos1	2	Blood serum	1H WATERGATE	HIV patient after treatment (AT)	8pos1
9pos1	2	Blood serum	1H WATERGATE	HIV patient after treatment (AT)	9pos1
10pos1	2	Blood serum	1H WATERGATE	HIV patient after treatment (AT)	10pos1
12pos1	2	Blood serum	1H WATERGATE	HIV patient after treatment (AT)	12pos1
13pos1	2	Blood serum	1H WATERGATE	HIV patient after treatment (AT)	13pos1
14pos1	2	Blood serum	1H WATERGATE	HIV patient after treatment (AT)	14pos1
15pos1	2	Blood serum	1H WATERGATE	HIV patient after treatment (AT)	15pos1
16pos1	2	Blood serum	1H WATERGATE	HIV patient after treatment (AT)	16pos1
17pos1	2	Blood serum	1H WATERGATE	HIV patient after treatment (AT)	17pos1
1pos2	2	Blood serum	1H WATERGATE	HIV patient after treatment (AT)	1pos2
4pos2	2	Blood serum	1H WATERGATE	HIV patient after treatment (AT)	4pos2
6pos2	2	Blood serum	1H WATERGATE	HIV patient after treatment (AT)	6pos2
8pos2	2	Blood serum	1H WATERGATE	HIV patient after treatment (AT)	8pos2
10pos2	2	Blood serum	1H WATERGATE	HIV patient after treatment (AT)	10pos2
12pos2	2	Blood serum	1H WATERGATE	HIV patient after treatment (AT)	12pos2
13pos2	2	Blood serum	1H WATERGATE	HIV patient after treatment (AT)	13pos2
14pos2	2	Blood serum	1H WATERGATE	HIV patient after treatment (AT)	14pos2
15pos2	2	Blood serum	1H WATERGATE	HIV patient after treatment (AT)	15pos2
16pos2	2	Blood serum	1H WATERGATE	HIV patient after treatment (AT)	16pos2
17pos2	2	Blood serum	1H WATERGATE	HIV patient after treatment (AT)	17pos2
1pre1	4	Blood serum	1H edited by diffusion	HIV patient before treatment (BT)	1pre1
2pre1	4	Blood serum	1H edited by diffusion	HIV patient before treatment (BT)	2pre1
4pre1	4	Blood serum	1H edited by diffusion	HIV patient before treatment (BT)	4pre1
6pre1	4	Blood serum	1H edited by diffusion	HIV patient before treatment (BT)	6pre1
13pre1	4	Blood serum	1H edited by diffusion	HIV patient before treatment (BT)	13pre1
12pre1	4	Blood serum	1H edited by diffusion	HIV patient before treatment (BT)	12pre1
10pre1	4	Blood serum	1H edited by diffusion	HIV patient before treatment (BT)	10pre1
9pre1	4	Blood serum	1H edited by diffusion	HIV patient before treatment (BT)	9pre1
8pre1	4	Blood serum	1H edited by diffusion	HIV patient before treatment (BT)	8pre1
14pre1	4	Blood serum	1H edited by diffusion	HIV patient before treatment (BT)	14pre1
16pre1	4	Blood serum	1H edited by diffusion	HIV patient before treatment (BT)	16pre1
17pre1	4	Blood serum	1H edited by diffusion	HIV patient before treatment (BT)	17pre1
1pre2	4	Blood serum	1H edited by diffusion	HIV patient before treatment (BT)	1pre2
4pre2	4	Blood serum	1H edited by diffusion	HIV patient before treatment (BT)	4pre2
6pre2	4	Blood serum	1H edited by diffusion	HIV patient before treatment (BT)	6pre2
8pre2	4	Blood serum	1H edited by diffusion	HIV patient before treatment (BT)	8pre2
9pre2	4	Blood serum	1H edited by diffusion	HIV patient before treatment (BT)	9pre2
10pre2	4	Blood serum	1H edited by diffusion	HIV patient before treatment (BT)	10pre2
12pre2	4	Blood serum	1H edited by diffusion	HIV patient before treatment (BT)	12pre2
13pre2	4	Blood serum	1H edited by diffusion	HIV patient before treatment (BT)	13pre2
14pre2	4	Blood serum	1H edited by diffusion	HIV patient before treatment (BT)	14pre2
15pre2	4	Blood serum	1H edited by diffusion	HIV patient before treatment (BT)	15pre2
16pre2	4	Blood serum	1H edited by diffusion	HIV patient before treatment (BT)	16pre2
17pre2	4	Blood serum	1H edited by diffusion	HIV patient before treatment (BT)	17pre2
1pos1	4	Blood serum	1H edited by diffusion	HIV patient after treatment (AT)	1pos1
2pos1	4	Blood serum	1H edited by diffusion	HIV patient after treatment (AT)	2pos1
4pos1	4	Blood serum	1H edited by diffusion	HIV patient after treatment (AT)	4pos1
6pos1	4	Blood serum	1H edited by diffusion	HIV patient after treatment (AT)	6pos1
8pos1	4	Blood serum	1H edited by diffusion	HIV patient after treatment (AT)	8pos1
9pos1	4	Blood serum	1H edited by diffusion	HIV patient after treatment (AT)	9pos1
14pos1	4	Blood serum	1H edited by diffusion	HIV patient after treatment (AT)	14pos1
10pos1	4	Blood serum	1H edited by diffusion	HIV patient after treatment (AT)	10pos1
13pos1	4	Blood serum	1H edited by diffusion	HIV patient after treatment (AT)	13pos1
12pos1	4	Blood serum	1H edited by diffusion	HIV patient after treatment (AT)	12pos1
16pos1	4	Blood serum	1H edited by diffusion	HIV patient after treatment (AT)	16pos1
15pos1	4	Blood serum	1H edited by diffusion	HIV patient after treatment (AT)	15pos1
17pos1	4	Blood serum	1H edited by diffusion	HIV patient after treatment (AT)	17pos1
1pos2	4	Blood serum	1H edited by diffusion	HIV patient after treatment (AT)	1pos2
8pos2	4	Blood serum	1H edited by diffusion	HIV patient after treatment (AT)	8pos2
4pos2	4	Blood serum	1H edited by diffusion	HIV patient after treatment (AT)	4pos2
6pos2	4	Blood serum	1H edited by diffusion	HIV patient after treatment (AT)	6pos2
10pos2	4	Blood serum	1H edited by diffusion	HIV patient after treatment (AT)	10pos2
12pos2	4	Blood serum	1H edited by diffusion	HIV patient after treatment (AT)	12pos2
13pos2	4	Blood serum	1H edited by diffusion	HIV patient after treatment (AT)	13pos2
14pos2	4	Blood serum	1H edited by diffusion	HIV patient after treatment (AT)	14pos2
15pos2	4	Blood serum	1H edited by diffusion	HIV patient after treatment (AT)	15pos2
16pos2	4	Blood serum	1H edited by diffusion	HIV patient after treatment (AT)	16pos2
17pos2	4	Blood serum	1H edited by diffusion	HIV patient after treatment (AT)	17pos2
			classe	classe	ppm
			P	P	1_1
			P	P	2_1
			P	P	4_1
			P	P	6_1
			P	P	8_1
			P	P	9_1
			P	P	10_1
			P	P	12_1
			P	P	13_1
			P	P	16_1
			P	P	14_1
			P	P	17_1
			P	P	2_2
			P	P	4_2
			P	P	6_2
			P	P	8_2
			P	P	9_2
			P	P	10_2
			P	P	12_2
			P	P	13_2
			P	P	14_2
			P	P	15_2
			P	P	16_2
			P	P	17_2
			C	C	31_1
			C	C	32_1
			C	C	33_1
			C	C	36_1
			C	C	45_1
			C	C	46_1
			C	C	47_1
			C	C	52_1
			C	C	53_1
			C	C	56_1
			C	C	58_1
			C	C	59_1
			C	C	31_2
			C	C	32_2
			C	C	33_2
			C	C	34_2
			C	C	35_2
			C	C	45_2
			C	C	46_2
			C	C	47_2
			C	C	52_2
			C	C	53_2
			C	C	58_2
			C	C	59_2
			classe	classe	ppm
			P	P	1_1
			P	P	2_1
			P	P	4_1
			P	P	6_1
			P	P	8_1
			P	P	9_1
			P	P	10_1
			P	P	12_1
			P	P	13_1
			P	P	16_1
			P	P	14_1
			P	P	17_1
			P	P	2_2
			P	P	4_2
			P	P	6_2
			P	P	8_2
			P	P	9_2
			P	P	10_2
			P	P	12_2
			P	P	13_2
			P	P	14_2
			P	P	15_2
			P	P	16_2
			P	P	17_2
			C	C	31_1
			C	C	32_1
			C	C	33_1
			C	C	36_1
			C	C	45_1
			C	C	46_1
			C	C	47_1
			C	C	52_1
			C	C	53_1
			C	C	56_1
			C	C	58_1
			C	C	59_1
			C	C	31_2
			C	C	32_2
			C	C	33_2
			C	C	34_2
			C	C	35_2
			C	C	45_2
			C	C	46_2
			C	C	47_2
			C	C	52_2
			C	C	53_2
			C	C	58_2
			C	C	59_2
			classe	classe	ppm
			P	P	1_1
			P	P	2_1
			P	P	4_1
			P	P	6_1
			P	P	8_1
			P	P	9_1
			P	P	10_1
			P	P	12_1
			P	P	13_1
			P	P	16_1
			P	P	14_1
			P	P	17_1
			P	P	2_2
			P	P	4_2
			P	P	6_2
			P	P	8_2
			P	P	9_2
			P	P	10_2
			P	P	12_2
			P	P	13_2
			P	P	14_2
			P	P	15_2
			P	P	16_2
			P	P	17_2
			C	C	31_1
			C	C	32_1
			C	C	33_1
			C	C	36_1
			C	C	45_1
			C	C	46_1
			C	C	47_1
			C	C	52_1
			C	C	53_1
			C	C	56_1
			C	C	58_1
			C	C	59_1
			C	C	31_2
			C	C	32_2
			C	C	33_2
			C	C	34_2
			C	C	35_2
			C	C	45_2
			C	C	46_2
			C	C	47_2
			C	C	52_2
			C	C	53_2
			C	C	58_2
			C	C	59_2
			classe	classe	ppm
			P	P	1_1
			P	P	2_1
			P	P	4_1
			P	P	6_1
			P	P	8_1
			P	P	9_1
			P	P	10_1
			P	P	12_1
			P	P	13_1
			P	P	16_1
			P	P	14_1
			P	P	17_1
			P	P	2_2
			P	P	4_2
			P	P	6_2
			P	P	8_2
			P	P	9_2
			P	P	10_2
			P	P	12_2
			P	P	13_2
			P	P	14_2
			P	P	15_2
			P	P	16_2
			P	P	17_2
			C	C	31_1
			C	C	32_1
			C	C	33_1
			C	C	36_1
			C	C	45_1
			C	C	46_1
			C	C	47_1
			C	C	52_1
			C	C	53_1
			C	C	56_1
			C	C	58_1
			C	C	59_1
			C	C	31_2
			C	C	32_2
			C	C	33_2
			C	C	34_2
			C	C	35_2
			C	C	45_2
			C	C	46_2
			C	C	47_2
			C	C	52_2
			C	C	53_2
			C	C	58_2
			C	C	59_2
			classe	classe	ppm
			P	P	1_1
			P	P	2_1
			P	P	4_1
			P	P	6_1
			P	P	8_1
			P	P	9_1
			P	P	10_1
			P	P	12_1
			P	P	13_1
			P	P	16_1
			P	P	14_1
			P	P	17_1
			P	P	2_2
			P	P	4_2
			P	P	6_2
			P	P	8_2
			P	P	9_2
			P	P	10_2
			P	P	12_2
			P	P	13_2
			P	P	14_2
			P	P	15_2
			P	P	16_2
			P	P	17_2
			C	C	31_1
			C	C	32_1
			C	C	33_1
			C	C	36_1
			C	C	45_1
			C	C	46_1
			C	C	47_1
			C	C	52_1
			C	C	53_1
			C	C	56_1
			C	C	58_1
			C	C	59_1
			C	C	31_2
			C	C	32_2
			C	C	33_2
			C	C	34_2
			C	C	35_2
			C	C	45_2
			C	C	46_2
			C	C	47_2
			C	C	52_2
			C	C	53_2
			C	C	58_2
			C	C	59_2
			classe	classe	ppm
			P	P	1_1
			P	P	2_1
			P	P	4_1
			P	P	6_1
			P	P	8_1
			P	P	9_1
			P	P	10_1
			P	P	12_1
			P	P	13_1
			P	P	16_1
			P	P	14_1
			P	P	17_1
			P	P	2_2
			P	P	4_2
			P	P	6_2
			P	P	8_2
			P	P	9_2
			P	P	10_2
			P	P	12_2
			P	P	13_2
			P	P	14_2
			P	P	15_2
			P	P	16_2
			P	P	17_2
			C	C	31_1
			C	C	32_1
			C	C	33_1
			C	C	36_1
			C	C	45_1
			C	C	46_1
			C	C	47_1
			C	C	52_1
			C	C	53_1
			C	C	56_1
			C	C	58_1
			C	C	59_1
			C	C	31_2
			C	C	32_2
			C	C	33_2
			C	C	34_2
			C	C	35_2
			C	C	45_2
			C	C	46_2
			C	C	47_2
			C	C	52_2
			C	C	53_2
			C	C	58_2
			C	C	59_2
			classe	classe	ppm
			P	P	1_1
			P	P	2_1
			P	P	4_1
			P	P	6_1
			P	P	8_1
			P	P	9_1
			P	P	10_1
			P	P	12_1
			P	P	13_1
			P	P	16_1
			P	P	14_1
			P	P	17_1
			P	P	2_2
			P	P	4_2
			P	P	6_2
			P	P	8_2
			P	P	9_2
			P	P	10_2
			P	P	12_2
			P	P	13_2
			P	P	14_2
			P	P	15_2
			P	P	16_2
			P	P	17_2
			C	C	31_1
			C	C	32_1
			C	C	33_1
			C	C	36_1
			C	C	45_1
			C	C	46_1
			C	C	47_1
			C	C	52_1
			C	C	53_1
			C	C	56_1
			C	C	58_1
			C	C	59_1
			C	C	31_2
			C	C	32_2
			C	C	33_2
			C	C	34_2
			C	C	35_2
			C	C	45_2
			C	C	46_2
			C	C	47_2
			C	C	52_2
			C	C	53_2
			C	C	58_2
			C	C	59_2
			classe	classe	ppm
			P	P	1_1
			P	P	2_1
			P	P	4_1
			P	P	6_1
			P	P	8_1
			P	P	9_1
			P	P	10_1
			P	P	12_1
			P	P	13_1
			P	P	16_1
			P	P	14_1
			P	P	17_1
			P	P	2_2
			P	P	4_2
			P	P	6_2
			P	P	8_2
			P	P	9_2
			P	P	10_2
			P	P	12_2
			P	P	13_2
			P	P	14_2
			P	P	15_2
			P	P	16_2
			P	P	17_2
			C	C	31_1
			C	C	32_1
			C	C	33_1
			C	C	36_1
			C	C	45_1
			C	C	46_1
			C	C	47_1
			C	C	52_1
			C	C	53_1
			C	C	56_1
			C	C	58_1
			C	C	59_1
			C	C	31_2
			C	C	32_2
			C	C	33_2
			C	C	34_2
			C	C	35_2
			C	C	45_2
			C	C	46_2
			C	C	47_2
			C	C	52_2
			C	C	53_2
			C	C	58_2
			C	C	59_2
			classe	classe	ppm
			P	P	1_1
			P	P	2_1
			P	P	4_1
			P	P	6_1
			P	P	8_1
			P	P	9_1
			P	P	10_1
			P	P	12_1
			P	P	13_1
			P	P	16_1
			P	P	14_1
			P	P	17_1
			P	P	2_2
			P	P	4_2
			P	P	6_2
			P	P	8_2
			P	P	9_2
			P	P	10_2
			P	P	12_2
			P	P	13_2
			P	P	14_2
			P	P	15_2
			P	P	16_2
			P	P	17_2
			C	C	31_1
			C	C	32_1
			C	C	33_1
			C	C	36_1
			C	C	45_1
			C	C	46_1
			C	C	47_1
			C	C	52_1
			C	C	53_1
			C	C	56_1
			C	C	58_1
			C	C	59_1
			C	C	31_2
			C	C	32_2
			C	C	33_2
			C	C	34_2
			C	C	35_2
			C	C	45_2
			C	C	46_2
			C	C	47_2
			C	C	52_2
			C	C	53_2
			C	C	58_2
			C	C	59_2
			classe	classe	ppm
			P	P	1_1
			P	P	2_1
			P	P	4_1
			P	P	6_1
			P	P	8_1
			P	P	9_1
			P	P	10_1
			P	P	12_1
			P	P	13_1
			P	P	16_1
			P	P	14_1
			P	P	17_1
			P	P	2_2
			P	P	4_2
			P	P	6_2
			P	P	8_2
			P	P	9_2
			P	P	10_2
			P	P	12_2
			P	P	13_2
			P	P	14_2
			P	P	15_2
			P	P	16_2
			P	P	17_2
			C	C	31_1
			C	C	32_1
			C	C	33_1
			C	C	36_1
			C	C	45_1
			C	C	46_1
			C	C	47_1
			C	C	52_1
			C	C	53_1
			C	C	56_1
			C	C	58_1
			C	C	59_1
			C	C	31_2
			C	C	32_2
			C	C	33_2
			C	C	34_2
			C	C	35_2
			C	C	45_2
			C	C	46_2
			C	C	47_2
			C	C	52_2
			C	C	53_2
			C	C	58_2
			C	C	59_2
			classe	classe	ppm
			P	P	1_1
			P	P	2_1
			P	P	4_1
			P	P	6_1
			P	P	8_1
			P	P	9_1
			P	P	10_1
			P	P	12_1
			P	P	13_1
			P	P	16_1
			P	P	14_1
			P	P	17_1
			P	P	2_2
			P	P	4_2
			P	P	6_2
			P	P	8_2
			P	P	9_2
			P	P	10_2
			P	P	12_2
			P	P	13_2
			P	P	14_2
			P	P	15_2
			P	P	16_2
			P	P	17_2
			C	C	31_1
			C	C	32_1
			C	C	33_1
			C	C	36_1
			C	C	45_1
			C	C	46_1
			C	C	47_1
			C	C	52_1
			C	C	53_1
			C	C	56_1
			C	C	58_1
			C	C	59_1
			C	C	31_2
			C	C	32_2
			C	C	33_2
			C	C	34_2
			C	C	35_2
			C	C	45_2
			C	C	46_2
			C	C	47_2
			C	C	52_2
			C	C	53_2
			C	C	58_2
			C	C	59_2
			classe	classe	ppm
			P	P	1_1
			P	P	2_1
			P	P	4_1
			P	P	6_1
			P	P	8_1
			P	P	9_1
			P	P	10_1
			P	P	12_1
			P	P	13_1
			P	P	16_1
			P	P	14_1
			P	P	17_1
			P	P	2_2
			P	P	4_2
			P	P	6_2
			P	P	8_2
			P	P	9_2
			P	P	10_2
			P	P	12_2
			P	P	13_2
			P	P	14_2
			P	P	15_2
			P	P	16_2
			P	P	17_2
			C	C	31_1
			C	C	32_1
			C	C	33_1
			C	C	36_1
			C	C	45_1
			C	C	46_1
			C	C	47_1
			C	C	52_1
			C	C	53_1
			C	C	56_1
			C	C	58_1
			C	C	59_1
			C	C	31_2
			C	C	32_2
			C	C	33_2
			C	C	34_2
			C	C	35_2
			C	C	45_2
			C	C	46_2
			C	C	47_2
			C	C	52_2
			C	C	53_2
			C	C	58_2
			C	C	59_2
			classe	classe	ppm
			P	P	1_1
			P	P	2_1
			P	P	4_1
			P	P	6_1
			P	P	8_1
			P	P	9_1
			P	P	10_1
			P	P	12_1
			P	P	13_1
			P	P	16_1
			P	P	14_1
			P	P	17_1
			P	P	2_2
			P	P	4_2
			P	P	6_2
			P	P	8_2
			P	P	9_2
			P	P	10_2
			P	P	12_2
			P	P	13_2
			P	P	14_2
			P	P	15_2
			P	P	16_2
			P	P	17_2
			C	C	31_1
			C	C	32_1
			C	C	33_1
			C	C	36_1
			C	C	45_1
			C	C	46_1
			C	C	47_1
			C	C	52_1
			C	C	53_1
			C	C	56_1
			C	C	58_1
			C	C	59_1
			C	C	31_2
			C	C	32_2
			C	C	33_2
			C	C	34_2
			C	C	35_2
			C	C	45_2
			C	C	46_2
			C	C	47_2
			C	C	52_2
			C	C	53_2
			C	C	58_2
			C	C	59_2
			classe	classe	ppm
			P	P	1_1
			P	P	2_1
			P	P	4_1
			P	P	6_1
			P	P	8_1
			P	P	9_1
			P	P	10_1
			P	P	12_1
			P	P	13_1
			P	P	16_1
			P	P	14_1
			P	P	17_1
			P	P	2_2
			P	P	4_2
			P	P	6_2
			P	P	8_2
			P	P	9_2
			P	P	10_2
			P	P	12_2
			P	P	13_2
			P	P	14_2
			P	P	15_2
			P	P	16_2
			P	P	17_2
			C	C	31_1
			C	C	32_1
			C	C	33_1
			C	C	36_1
			C	C	45_1
			C	C	46_1
			C	C	47_1
			C	C	52_1
			C	C	53_1
			C	C	56_1
			C	C	58_1
			C	C	59_1
			C	C	31_2
			C	C	32_2
			C	C	33_2
			C	C	34_2
			C	C	35_2
			C	C	45_2
			C	C	46_2
			C	C	47_2
			C	C	52_2
			C	C	53_2
			C	C	58_2
			C	C	59_2
			classe	classe	ppm
			P	P	1_1
			P	P	2_1
			P	P	4_1
			P	P	6_1
			P	P	8_1
			P	P	9_1
			P	P	10_1
			P	P	12_1
			P	P	13_1
			P	P	16_1
			P	P	14_1
			P	P	17_1
			P	P	2_2
			P	P	4_2
			P	P	6_2
			P	P	8_2
			P	P	9_2
			P	P	10_2
			P	P	12_2
			P	P	13_2
			P	P	14_2
			P	P	15_2
			P	P	16_2
			P	P	17_2
			C	C	31_1
			C	C	32_1
			C	C	33_1
			C	C	36_1
			C	C	45_1
			C	C	46_1
			C	C	47_1
			C	C	52_1
			C	C	53_1
			C	C	56_1
			C	C	58_1
			C	C	59_1
			C	C	31_2
			C	C	32_2
			C	C	33_2
			C	C	34_2
			C	C	35_2
			C	C	45_2
			C	C	46_2
			C	C	47_2
			C	C	52_2
			C	C	53_2
			C	C	58_2
			C	C	59_2
			classe	classe	ppm
			P	P	1_1
			P	P	2_1
			P	P	4_1
			P	P	6_1
			P	P	8_1
			P	P	9_1
			P	P	10_1
			P	P	12_1
			P	P	13_1
			P	P	16_1
			P	P	14_1
			P	P	17_1
			P	P	2_2
			P	P	4_2
			P	P	6_2
			P	P	8_2
			P	P	9_2
			P	P	10_2
			P	P	12_2
			P	P	13_2
			P	P	14_2
			P	P	15_2
			P	P	16_2
			P	P	17_2
			C	C	31_1
			C	C	32_1
			C	C	33_1
			C	C	36_1
			C	C	45_1
			C	C	46_1
			C	C	47_1
			C	C	52_1
			C	C	53_1
			C	C	56_1
			C	C	58_1
			C	C	59_1
			C	C	31_2
			C	C	32_2
			C	C	33_2
			C	C	34_2
			C	C	35_2
			C	C	45_2
			C	C	46_2
			C	C	47_2
			C	C	52_2
			C	C	53_2
			C	C	58_2
			C	C	59_2
			classe	classe	ppm
			P	P	1_1
			P	P	2_1
			P	P	4_1
			P	P	6_1
			P	P	8_1
			P	P	9_1
			P	P	10_1
			P	P	12_1
			P	P	13_1
			P	P	16_1
			P	P	14_1
			P	P	17_1
			P	P	2_2
			P	P	4_2
			P	P	6_2
			P	P	8_2
			P	P	9_2
			P	P	10_2
			P	P	12_2
			P	P	13_2
			P	P	14_2
			P	P	15_2
			P	P	16_2
			P	P	17_2
			C	C	31_1
			C	C	32_1
			C	C	33_1
			C	C	36_1
			C	C	45_1
			C	C	46_1
			C	C	47_1
			C	C	52_1
			C	C	53_1
			C	C	56_1
			C	C	58_1
			C	C	59_1
			C	C	31_2
			C	C	32_2
			C	C	33_2
			C	C	34_2
			C	C	35_2
			C	C	45_2
			C	C	46_2
			C	C	47_2
			C	C	52_2
			C	C	53_2
			C	C	58_2
			C	C	59_2
			classe	classe	ppm
			P	P	1_1
			P	P	2_1
			P	P	4_1
			P	P	6_1
			P	P	8_1
			P	P	9_1
			P	P	10_1
			P	P	12_1
			P	P	13_1
			P	P	16_1
			P	P	14_1
			P	P	17_1
			P	P	2_2
			P	P	4_2
			P	P	6_2
			P	P	8_2
			P	P	9_2
			P	P	10_2
			P	P	12_2
			P	P	13_2
			P	P	14_2
			P	P	15_2
			P	P	16_2
			P	P	17_2
			C	C	31_1
			C	C	32_1
			C	C	33_1
			C	C	36_1
			C	C	45_1
			C	C	46_1
			C	C	47_1
			C	C	52_1
			C	C	53_1
			C	C	56_1
			C	C	58_1
			C	C	59_1
			C	C	31_2
			C	C	32_2
			C	C	33_2
			C	C	34_2
			C	C	35_2
			C	C	45_2
			C	C	46_2
			C	C	47_2
			C	C	52_2
			C	C	53_2
			C	C	58_2
			C	C	59_2
			classe	classe	ppm
			P	P	1_1
			P	P	2_1
			P	P	4_1
			P	P	6_1
			P	P	8_1
			P	P	9_1
			P	P	10_1
			P	P	12_1
			P	P	13_1
			P	P	16_1
			P	P	14_1
			P	P	17_1
			P	P	2_2
			P	P	4_2
			P	P	6_2
			P	P	8_2
			P	P	9_2
			P	P	10_2
			P	P	12_2
			P	P	13_2
			P	P	14_2
			P	P	15_2
			P	P	16_2
			P	P	17_2
			C	C	31_1
			C	C	32_1
			C	C	33_1
			C	C	36_1
			C	C	45_1
			C	C	46_1
			C	C	47_1
			C	C	52_1
			C	C	53_1
			C	C	56_1
			C	C	58_1
			C	C	59_1
			C	C	31_2
			C	C	32_2
			C	C	33_2
			C	C	34_2
			C	C	35_2
			C	C	45_2
			C	C	46_2
			C	C	47_2
			C	C	52_2
			C	C	53_2
			C	C	58_2
			C	C	59_2
			classe	classe	ppm
			P	P	1_1
			P	P	2_1
			P	P	4_1
			P	P	6_1
			P	P	8_1
			P	P	9_1
			P	P	10_1
			P	P	12_1
			P	P	13_1
			P	P	16_1
			P	P	14_1
			P	P	17_1
			P	P	2_2
			P	P	4_2
			P	P	6_2
			P	P	8_2
			P	P	9_2
			P	P	10_2
			P	P	12_2
			P	P	13_2
			P	P	14_2
			P	P	15_2
			P	P	16_2
			P	P	17_2
			C	C	31_1
			C	C	32_1
			C	C	33_1
			C	C	36_1
			C	C	45_1
			C	C	46_1
			C	C	47_1
			C	C	52_1
			C	C	53_1
			C	C	56_1
			C	C	58_1
			C	C	59_1
			C	C	31_2
			C	C	32_2
			C	C	33_2
			C	C	34_2
			C	C	35_2
			C	C	45_2
			C	C	46_2
			C	C	47_2
			C	C	52_2
			C	C	53_2
			C	C	58_2
			C	C	59_2
			classe	classe	ppm
			P	P	1_1
			P	P	2_1
			P	P	4_1
			P	P	6_1
			P	P	8_1
			P	P	9_1
			P	P	10_1
			P	P	12_1
			P	P	13_1
			P	P	16_1
			P	P	14_1
			P	P	17_1
			P	P	2_2
			P	P	4_2
			P	P	6_2
			P	P	8_2
			P	P	9_2
			P	P	10_2
			P	P	12_2
			P	P	13_2
			P	P	14_2
			P	P	15_2
			P	P	16_2
			P	P	17_2
			C	C	31_1
			C	C	32_1
			C	C	33_1
			C	C	36_1
			C	C	45_1
			C	C	46_1
			C	C	47_1
			C	C	52_1
			C	C	53_1
			C	C	56_1
			C	C	58_1
			C	C	59_1
			C	C	31_2
			C	C	32_2
			C	C	33_2
			C	C	34_2
			C	C	35_2
			C	C	45_2
			C	C	46_2
			C	C	47_2
			C	C	52_2
			C	C	53_2
			C	C	58_2
			C	C	59_2
			classe	classe	ppm
			P	P	1_1
			P	P	2_1
			P	P	4_1
			P	P	6_1
			P	P	8_1
			P	P	9_1
			P	P	10_1
			P	P	12_1
			P	P	13_1
			P	P	16_1
			P	P	14_1
			P	P	17_1
			P	P	2_2
			P	P	4_2
			P	P	6_2
			P	P	8_2
			P	P	9_2
			P	P	10_2
			P	P	12_2
			P	P	13_2
			P	P	14_2
			P	P	15_2
			P	P	16_2
			P	P	17_2
			C	C	31_1
			C	C	32_1
			C	C	33_1
			C	C	36_1
			C	C	45_1
			C	C	46_1
			C	C	47_1
			C	C	52_1
			C	C	53_1
			C	C	56_1
			C	C	58_1
			C	C	59_1
			C	C	31_2
			C	C	32_2
			C	C	33_2
			C	C	34_2
			C	C	35_2
			C	C	45_2
			C	C	46_2
			C	C	47_2
			C	C	52_2
			C	C	53_2
			C	C	58_2
			C	C	59_2
			classe	classe	ppm
			P	P	1_1
			P	P	2_1
			P	P	4_1
			P	P	6_1
			P	P	8_1
			P	P	9_1
			P	P	10_1
			P	P	12_1
			P	P	13_1
			P	P	16_1
			P	P	14_1
			P	P	17_1
			P	P	2_2
			P	P	4_2
			P	P	6_2
			P	P	8_2
			P	P	9_2
			P	P	10_2
			P	P	12_2
			P	P	13_2
			P	P	14_2
			P	P	15_2
			P	P	16_2
			P	P	17_2
			C	C	31_1
			C	C	32_1
			C	C	33_1
			C	C	36_1
			C	C	45_1
			C	C	46_1
			C	C	47_1
			C	C	52_1
			C	C	53_1
			C	C	56_1
			C	C	58_1
			C	C	59_1
			C	C	31_2
			C	C	32_2
			C	C	33_2
			C	C	34_2
			C	C	35_2
			C	C	45_2
			C	C	46_2
			C	C	47_2
			C	C	52_2
			C	C	53_2
			C	C	58_2
			C	C	59_2
			classe	classe	ppm
			P	P	1_1
			P	P	2_1
			P	P	4_1
			P	P	6_1
			P	P	8_1
			P	P	9_1
			P	P	10_1
			P	P	12_1
			P	P	13_1
			P	P	16_1
			P	P	14_1
			P	P	17_1
			P	P	2_2
			P	P	4_2
			P	P	6_2
			P	P	8_2
			P	P	9_2
			P	P	10_2
			P	P	12_2
			P	P	13_2
			P	P	14_2
			P	P	15_2
			P	P	16_2
			P	P	17_2
			C	C	31_1
			C	C	32_1
			C	C	33_1
			C	C	36_1
			C	C	45_1
			C	C	46_1
			C	C	47_1
			C	C	52_1
			C	C	53_1
			C	C	56_1
			C	C	58_1
			C	C	59_1
			C	C	31_2
			C	C	32_2
			C	C	33_2
			C	C	34_2
			C	C	35_2
			C	C	45_2
			C	C	46_2
			C	C	47_2
			C	C	52_2
			C	C	53_2
			C	C	58_2
			C	C	59_2
			classe	classe	ppm
			P	P	1_1
			P	P	2_1
			P	P	4_1
			P	P	6_1
			P	P	8_1
			P	P	9_1
			P	P	10_1
			P	P	12_1
			P	P	13_1
			P	P	16_1
			P	P	14_1
			P	P	17_1
			P	P	2_2
			P	P	4_2
			P	P	6_2
			P	P	8_2
			P	P	9_2
			P	P	10_2
			P	P	12_2
			P	P	13_2
			P	P	14_2
			P	P	15_2
			P	P	16_2
			P	P	17_2
			C	C	31_1
			C	C	32_1
			C	C	33_1
			C	C	36_1
			C	C	45_1
			C	C	46_1
			C	C	47_1
			C	C	52_1
			C	C	53_1
			C	C	56_1
			C	C	58_1
			C	C	59_1
			C	C	31_2
			C	C	32_2
			C	C	33_2
			C	C	34_2
			C	C	35_2
			C	C	45_2
			C	C	46_2
			C	C	47_2
			C	C	52_2
			C	C	53_2
			C	C	58_2
			C	C	59_2
			classe	classe	ppm
			P	P	1_1
			P	P	2_1
			P	P	4_1
			P	P	6_1
			P	P	8_1
			P	P	9_1
			P	P	10_1
			P	P	12_1
			P	P	13_1
			P	P	16_1
			P	P	14_1
			P	P	17_1
			P	P	2_2
			P	P	4_2
			P	P	6_2
			P	P	8_2
			P	P	9_2
			P	P	10_2
			P	P	12_2
			P	P	13_2
			P	P	14_2
			P	P	15_2
			P	P	16_2
			P	P	17_2
			C	C	31_1
			C	C	32_1
			C	C	33_1
			C	C	36_1
			C	C	45_1
			C	C	46_1
			C	C	47_1
			C	C	52_1
			C	C	53_1
			C	C	56_1
			C	C	58_1
			C	C	59_1
			C	C	31_2
			C	C	32_2
			C	C	33_2
			C	C	34_2
			C	C	35_2
			C	C	45_2
			C	C	46_2
			C	C	47_2
			C	C	52_2
			C	C	53_2
			C	C	58_2
			C	C	59_2
			classe	classe	ppm
			P	P	1_1
			P	P	2_1
			P	P	4_1
			P	P	6_1
			P	P	8_1
			P	P	9_1
			P	P	10_1
			P	P	12_1
			P	P	13_1
			P	P	16_1
			P	P	14_1
			P	P	17_1
			P	P	2_2
			P	P	4_2
			P	P	6_2
			P	P	8_2
			P	P	9_2
			P	P	10_2
			P	P	12_2
			P	P	13_2
			P	P	14_2
			P	P	15_2
			P	P	16_2
			P	P	17_2
			C	C	31_1
			C	C	32_1
			C	C	33_1
			C	C	36_1
			C	C	45_1
			C	C	46_1
			C	C	47_1
			C	C	52_1
			C	C	53_1
			C	C	56_1
			C	C	58_1
			C	C	59_1
			C	C	31_2
			C	C	32_2
			C	C	33_2
			C	C	34_2
			C	C	35_2
			C	C	45_2
			C	C	46_2
			C	C	47_2
			C	C	52_2
			C	C	53_2
			C	C	58_2
			C	C	59_2
			classe	classe	ppm
			P	P	1_1
			P	P	2_1
			P	P	4_1
			P	P	6_1
			P	P	8_1
			P	P	9_1
			P	P	10_1
			P	P	12_1
			P	P	13_1
			P	P	16_1
			P	P	14_1
			P	P	17_1
			P	P	2_2
			P	P	4_2
			P	P	6_2
			P	P	8_2
			P	P	9_2
			P	P	10_2
			P	P	12_2
			P	P	13_2
			P	P	14_2
			P	P	15_2
			P	P	16_2
			P	P	17_2
			C	C	31_1
			C	C	32_1
			C	C	33_1
			C	C	36_1
			C	C	45_1
			C	C	46_1
			C	C	47_1
			C	C	52_1
			C	C	53_1
			C	C	56_1
			C	C	58_1
			C	C	59_1
			C	C	31_2
			C	C	32_2
			C	C	33_2
			C	C	34_2
			C	C	35_2
			C	C	45_2
			C	C	46_2
			C	C	47_2
			C	C	52_2
			C	C	53_2
			C	C	58_2
			C	C	59_2
			classe	classe	ppm
			P	P	1_1
			P	P	2_1
			P	P	4_1
			P	P	6_1
			P	P	8_1
			P	P	9_1
			P	P	10_1
			P	P	12_1
			P	P	13_1
			P	P	16_1
			P	P	14_1
			P	P	17_1
			P	P	2_2
			P	P	4_2
			P	P	6_2
			P	P	8_2
			P	P	9_2
			P	P	10_2
			P	P	12_2
			P	P	13_2
			P	P	14_2
			P	P	15_2
			P	P	16_2
			P	P	17_2
			C	C	31_1
			C	C	32_1
			C	C	33_1
			C	C	36_1
			C	C	45_1
			C	C	46_1
			C	C	47_1
			C	C	52_1
			C	C	53_1
			C	C	56_1
			C	C	58_1
			C	C	59_1
			C	C	31_2
			C	C	32_2
			C	C	33_2
			C	C	34_2
			C	C	35_2
			C	C	45_2
			C	C	46_2
			C	C	47_2
			C	C	52_2
			C	C	53_2
			C	C	58_2
			C	C	59_2
			classe	classe	ppm
			P	P	1_1
			P	P	2_1
			P	P	4_1
			P	P	6_1
			P	P	8_1
			P	P	9_1
			P	P	10_1
			P	P	12_1
			P	P	13_1
			P	P	16_1
			P	P	14_1
			P	P	17_1
			P	P	2_2
			P	P	4_2
			P	P	6_2
			P	P	8_2
			P	P	9_2
			P	P	10_2
			P	P	12_2
			P	P	13_2
			P	P	14_2
			P	P	15_2
			P	P	16_2
			P	P	17_2
			C	C	31_1
			C	C	32_1
			C	C	33_1
			C	C	36_1
			C	C	45_1
			C	C	46_1
			C	C	47_1
			C	C	52_1
			C	C	53_1
			C	C	56_1
			C	C	58_1
			C	C	59_1
			C	C	31_2
			C	C	32_2
			C	C	33_2
			C	C	34_2
			C	C	35_2
			C	C	45_2
			C	C	46_2
			C	C	47_2
			C	C	52_2
			C	C	53_2
			C	C	58_2
			C	C	59_2
			classe	classe	ppm
			P	P	1_1
			P	P	2_1
			P	P	4_1
			P	P	6_1
			P	P	8_1
			P	P	9_1
			P	P	10_1
			P	P	12_1
			P	P	13_1
			P	P	16_1
			P	P	14_1
			P	P	17_1
			P	P	2_2
			P	P	4_2
			P	P	6_2
			P	P	8_2
			P	P	9_2
			P	P	10_2
			P	P	12_2
			P	P	13_2
			P	P	14_2
			P	P	15_2
			P	P	16_2
			P	P	17_2
			C	C	31_1
			C	C	32_1
			C	C	33_1
			C	C	36_1
			C	C	45_1
			C	C	46_1
			C	C	47_1
			C	C	52_1
			C	C	53_1
			C	C	56_1
			C	C	58_1
			C	C	59_1
			C	C	31_2
			C	C	32_2
			C	C	33_2
			C	C	34_2
			C	C	35_2
			C	C	45_2
			C	C	46_2
			C	C	47_2
			C	C	52_2
			C	C	53_2
			C	C	58_2
			C	C	59_2
			classe	classe	ppm
			P	P	1_1
			P	P	2_1
			P	P	4_1
			P	P	6_1
			P	P	8_1
			P	P	9_1
			P	P	10_1
			P	P	12_1
			P	P	13_1
			P	P	16_1
			P	P	14_1
			P	P	17_1
			P	P	2_2
			P	P	4_2
			P	P	6_2
			P	P	8_2
			P	P	9_2
			P	P	10_2
			P	P	12_2
			P	P	13_2
			P	P	14_2
			P	P	15_2
			P	P	16_2
			P	P	17_2
			C	C	31_1
			C	C	32_1
			C	C	33_1
			C	C	36_1
			C	C	45_1
			C	C	46_1
			C	C	47_1
			C	C	52_1
			C	C	53_1
			C	C	56_1
			C	C	58_1
			C	C	59_1
			C	C	31_2
			C	C	32_2
			C	C	33_2
			C	C	34_2
			C	C	35_2
			C	C	45_2
			C	C	46_2
			C	C	47_2
			C	C	52_2
			C	C	53_2
			C	C	58_2
			C	C	59_2
			classe	classe	ppm
			P	P	1_1
			P	P	2_1
			P	P	4_1
			P	P	6_1
			P	P	8_1
			P	P	9_1
			P	P	10_1
			P	P	12_1
			P	P	13_1
			P	P	16_1
			P	P	14_1
			P	P	17_1
			P	P	2_2
			P	P	4_2
			P	P	6_2
			P	P	8_2
			P	P	9_2
			P	P	10_2
			P	P	12_2
			P	P	13_2
			P	P	14_2
			P	P	15_2
			P	P	16_2
			P	P	17_2
			C	C	31_1
			C	C	32_1
			C	C	33_1
			C	C	36_1
			C	C	45_1
			C	C	46_1
			C	C	47_1
			C	C	52_1
			C	C	53_1
			C	C	56_1
			C	C	58_1
			C	C	59_1
			C	C	31_2
			C	C	32_2
			C	C	33_2
			C	C	34_2
			C	C	35_2
			C	C	45_2
			C	C	46_2
			C	C	47_2
			C	C	52_2
			C	C	53_2
			C	C	58_2
			C	C	59_2
			classe	classe	ppm
			P	P	1_1
			P	P	2_1
			P	P	4_1
			P	P	6_1
			P	P	8_1
			P	P	9_1
			P	P	10_1
			P	P	12_1
			P	P	13_1
			P	P	16_1
			P	P	14_1
			P	P	17_1
			P	P	2_2
			P	P	4_2
			P	P	6_2
			P	P	8_2
			P	P	9_2
			P	P	10_2
			P	P	12_2
			P	P	13_2
			P	P	14_2
			P	P	15_2
			P	P	16_2
			P	P	17_2
			C	C	31_1
			C	C	32_1
			C	C	33_1
			C	C	36_1
			C	C	45_1
			C	C	46_1
			C	C	47_1
			C	C	52_1
			C	C	53_1
			C	C	56_1
			C	C	58_1
			C	C	59_1
			C	C	31_2
			C	C	32_2
			C	C	33_2
			C	C	34_2
			C	C	35_2
			C	C	45_2
			C	C	46_2
			C	C	47_2
			C	C	52_2
			C	C	53_2
			C	C	58_2
			C	C	59_2
			classe	classe	ppm
			P	P	1_1
			P	P	2_1
			P	P	4_1
			P	P	6_1
			P	P	8_1
			P	P	9_1
			P	P	10_1
			P	P	12_1
			P	P	13_1
			P	P	16_1
			P	P	14_1
			P	P	17_1
			P	P	2_2
			P	P	4_2
			P	P	6_2
			P	P	8_2
			P	P	9_2
			P	P	10_2
			P	P	12_2
			P	P	13_2
			P	P	14_2
			P	P	15_2
			P	P	16_2
			P	P	17_2
			C	C	31_1
			C	C	32_1
			C	C	33_1
			C	C	36_1
			C	C	45_1
			C	C	46_1
			C	C	47_1
			C	C	52_1
			C	C	53_1
			C	C	56_1
			C	C	58_1
			C	C	59_1
			C	C	31_2
			C	C	32_2
			C	C	33_2
			C	C	34_2
			C	C	35_2
			C	C	45_2
			C	C	46_2
			C	C	47_2
			C	C	52_2
			C	C	53_2
			C	C	58_2
			C	C	59_2
			classe	classe	ppm
			P	P	1_1
			P	P	2_1
			P	P	4_1
			P	P	6_1
			P	P	8_1
			P	P	9_1
			P	P	10_1
			P	P	12_1
			P	P	13_1
			P	P	16_1
			P	P	14_1
			P	P	17_1
			P	P	2_2
			P	P	4_2
			P	P	6_2
			P	P	8_2
			P	P	9_2
			P	P	10_2
			P	P	12_2
			P	P	13_2
			P	P	14_2
			P	P	15_2
			P	P	16_2
			P	P	17_2
			C	C	31_1
			C	C	32_1
			C	C	33_1
			C	C	36_1
			C	C	45_1
			C	C	46_1
			C	C	47_1
			C	C	52_1
			C	C	53_1
			C	C	56_1
			C	C	58_1
			C	C	59_1
			C	C	31_2
			C	C	32_2
			C	C	33_2
			C	C	34_2
			C	C	35_2
			C	C	45_2
			C	C	46_2
			C	C	47_2
			C	C	52_2
			C	C	53_2
			C	C	58_2
			C	C	59_2
			classe	classe	ppm
			P	P	1_1
			P	P	2_1
			P	P	4_1
			P	P	6_1
			P	P	8_1
			P	P	9_1
			P	P	10_1
			P	P	12_1
			P	P	13_1
			P	P	16_1
			P	P	14_1
			P	P	17_1
			P	P	2_2
			P	P	4_2
			P	P	6_2
			P	P	8_2
			P	P	9_2
			P	P	10_2
			P	P	12_2
			P	P	13_2
			P	P	14_2
			P	P	15_2
			P	P	16_2
			P	P	17_2
			C	C	31_1
			C	C	32_1
			C	C	33_1
			C	C	36_1
			C	C	45_1
			C	C	46_1
			C	C	47_1
			C	C	52_1
			C	C	53_1
			C	C	56_1
			C	C	58_1
			C	C	59_1
			C	C	31_2
			C	C	32_2
			C	C	33_2
			C	C	34_2
			C	C	35_2
			C	C	45_2
			C	C	46_2
			C	C	47_2
			C	C	52_2
			C	C	53_2
			C	C	58_2
			C	C	59_2
			classe	classe	ppm
			P	P	1_1
			P	P	2_1
			P	P	4_1
			P	P	6_1
			P	P	8_1
			P	P	9_1
			P	P	10_1
			P	P	12_1
			P	P	13_1
			P	P	16_1
			P	P	14_1
			P	P	17_1
			P	P	2_2
			P	P	4_2
			P	P	6_2
			P	P	8_2
			P	P	9_2
			P	P	10_2
			P	P	12_2
			P	P	13_2
			P	P	14_2
			P	P	15_2
			P	P	16_2
			P	P	17_2
			C	C	31_1
			C	C	32_1
			C	C	33_1
			C	C	36_1
			C	C	45_1
			C	C	46_1
			C	C	47_1
			C	C	52_1
			C	C	53_1
			C	C	56_1
			C	C	58_1
			C	C	59_1
			C	C	31_2
			C	C	32_2
			C	C	33_2
			C	C	34_2
			C	C	35_2
[truncated: 1,232 more rows]
