# Supplementary material for: Metabolite variations in the sera of HIV+ patients after an oral administration of effervescent glutamine and in comparison to non-HIV individuals by NMR
Source: Royal Society of Chemistry journal article supplement (doi:10.1039/d2mo00097k), 2022-09-10
Supplement: d2mo00097k2.pdf [file d2mo00097k2.pdf]

## Supplementary information

### **Metabolite variations in sera of HIV+ patients after an oral administration of effervescent glutamine and in comparison to non-HIV individuals by NMR**

*Lucas G. Martins<sup>1</sup>, Natália Fregonesi<sup>1</sup>, Roberto B. Bazotte<sup>2</sup>, Jeane E. L. Visentainer<sup>3</sup>, and Ljubica Tasic<sup>1\*</sup>*

<sup>1</sup> Chemical Biology Laboratory, Department of Organic Chemistry, Institute of Chemistry, University of Campinas (UNICAMP), Campinas, SP, Brazil.

<sup>2</sup> Department of Pharmacology and Therapeutics, State University of Maringá, Maringá, Paraná state, Brazil.

<sup>3</sup> Laboratory of Immunogenetics, Department of Basic Health Sciences, State University of Maringá, Maringá, Paraná state, Brazil

Table S1. Clinical characteristics\* of HIV+ patients

|                                     |                                   |
|-------------------------------------|-----------------------------------|
| <b>Time of infection</b>            | 6.3 ± 1.8 (range of 2 to 17).     |
|                                     | 1 to 5 years (58.3%)              |
|                                     | 5 to 10 years ( 16.6%)            |
|                                     | 10 to 15 years (25.0%)            |
| <b>Time of starting current ART</b> | 2.4 ± 0.6 years (range of 1 to 7) |
| <b>Antiviral therapy</b>            | 3TC, TDF, EFZ (41.7%)             |
|                                     | 3TC, AZT, LPV/r (16.7%)           |
|                                     | 3TC, AZT, RTV (8.3%)              |
|                                     | 3TC, TDF, ATV, RTV (8.3%)         |
|                                     | 3TC, TDF, EFZ, DRV, RTV(8.3%)     |
|                                     | 3TC, TDF, ATV/r (8.3%)            |
|                                     | 3TC, TDF, LPV/r (8.3%)            |

**Key:** Antiretroviral therapy (ART), Lamivudine (3TC), tenofovir (TDF), efavirenz (EFZ), zidovudine (AZT), lopinavir/ritonavir (LPV/r), atazanavir (ATV), ritonavir (RTV), darunavir (DRV), atazanavir/ritonavir (ATV/r).

The values are expressed as mean ±standard deviation.

\* Information previously published in *J. Med. Food* v. 23, p. 485-490, 2019.

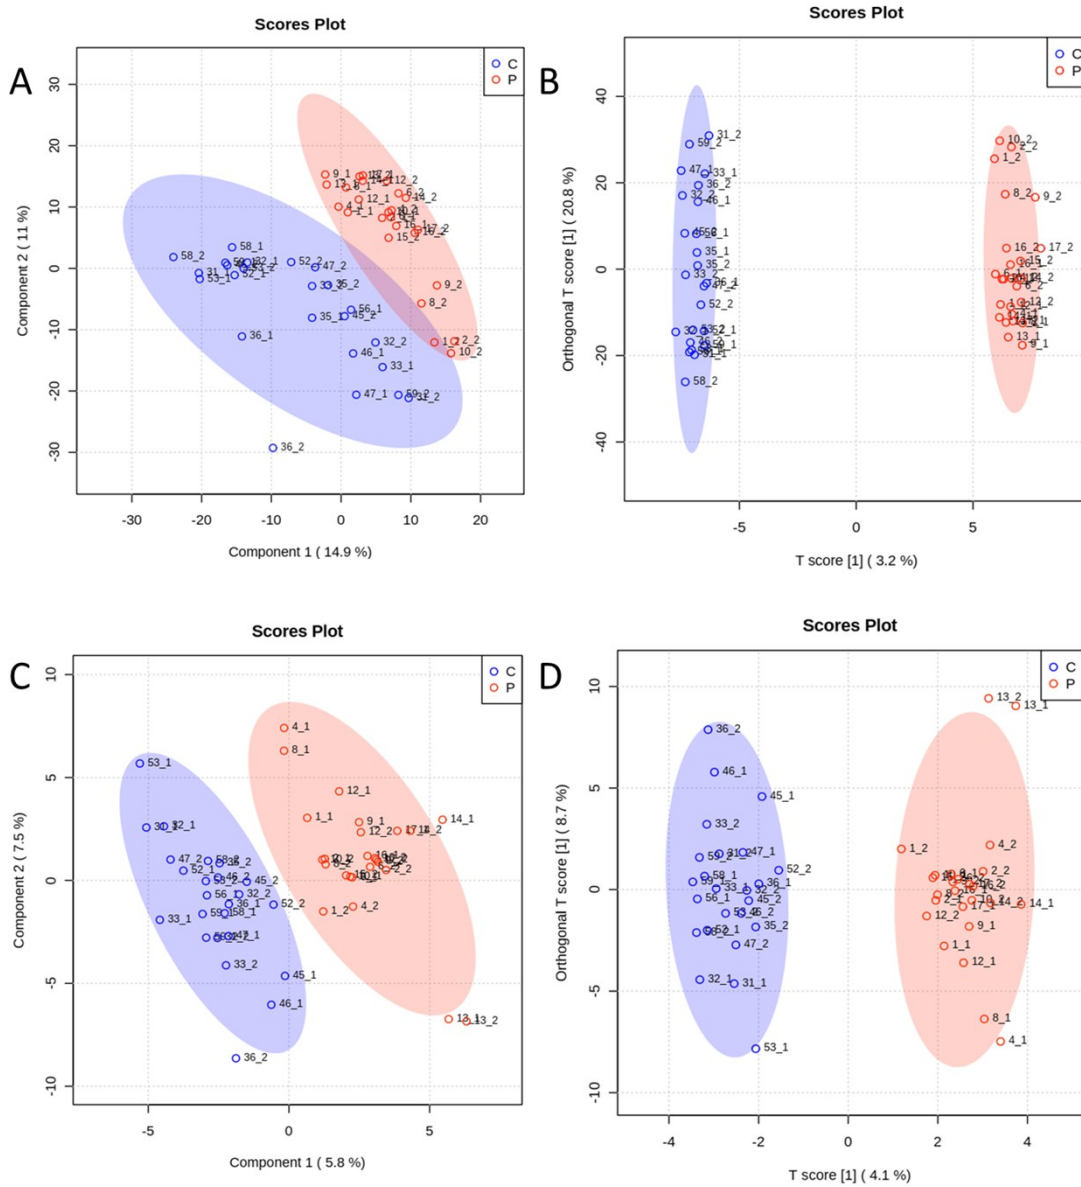

**Figure S1.** Multivariate analyses were performed on serum  $^1\text{H-NMR}$  data of HIV+ patients (P) and control donors (C). **A.** PLS-DA 2D scores from  $^1\text{H-NMR}$  data with water elimination pulse sequence (WATERGATE; Accuracy: 0.840;  $R^2$ : 0.974 and  $Q^2$ : 0.344). **B.** OPLS-DA 2D scores from  $^1\text{H-NMR}$  data with water elimination pulse sequence (WATERGATE). **C.** PLS-DA 2D scores from  $^1\text{H-NMR}$  edited by diffusion (stebpgp1s191d; Accuracy: 0.940;  $R^2$ : 0.924 and  $Q^2$ : 0.550). **D.** OPLS-DA 2D scores from  $^1\text{H-NMR}$  edited by diffusion (stebpgp1s191d).

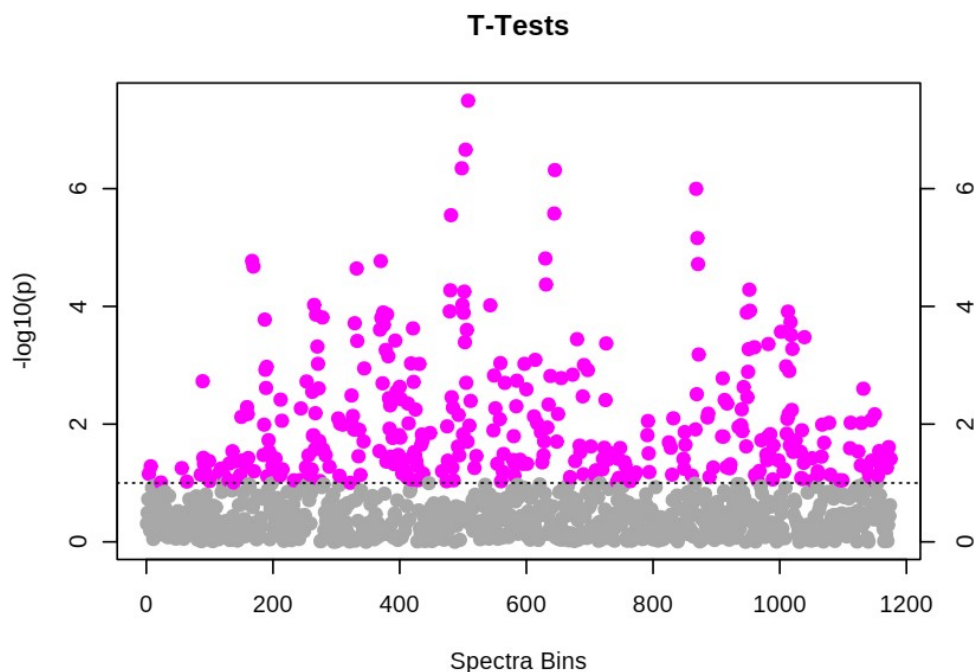

**Figure S2.** Important features selected by Univariate Analysis (t-tests) with threshold 0.1. They are responsible for summarizing  $^1\text{H-NMR}$  CPMG data from the serum of patients living with HIV (P), and control donors (C).

**Table S2.** Important metabolites selected by Univariate Analysis (t-tests, identified as the metabolites with the lowest p-value in the  $^1\text{H-NMR}$  CPMG serum data in patients living with HIV (P), and control donors (C)

| Name          | t.stat  | p.value                | $-\log_{10}(p)$ | FDR                   |
|---------------|---------|------------------------|-----------------|-----------------------|
| Tyrosine      | 5.6381  | $1.01 \times 10^{-6}$  | 5.9974          | $23.6 \times 10^{-5}$ |
| Threonine     | -4.8331 | $15.4 \times 10^{-6}$  | 4.8137          | $181 \times 10^{-5}$  |
| Pyruvate      | 4.1854  | $127 \times 10^{-6}$   | 3.8965          | $559 \times 10^{-5}$  |
| Phenylalanine | -4.4625 | $52.0 \times 10^{-6}$  | 4.2839          | $366 \times 10^{-5}$  |
| Lysine        | 6.0824  | $21.7 \times 10^{-6}$  | 6.6618          | $12.8 \times 10^{-5}$ |
| Lipids        | -4.8045 | $16.9 \times 10^{-6}$  | 4.7724          | $18.1 \times 10^{-5}$ |
| Lactate       | -4.7382 | $21.05 \times 10^{-6}$ | 4.6768          | $19.0 \times 10^{-5}$ |
| Glutamine     | -4.7149 | $22.7 \times 10^{-6}$  | 4.6434          | $19.1 \times 10^{-5}$ |
| Glutamate     | 4.8029  | $17.0 \times 10^{-6}$  | 4.7702          | $18.1 \times 10^{-5}$ |
| Glucose       | -5.8515 | $0.49 \times 10^{-6}$  | 6.3159          | $14.1 \times 10^{-5}$ |
| Creatine      | 6.6369  | $319 \times 10^{-6}$   | 7.4951          | $3.76 \times 10^{-5}$ |
| Choline       | 4.2735  | $958 \times 10^{-6}$   | 4.0187          | $5.35 \times 10^{-5}$ |

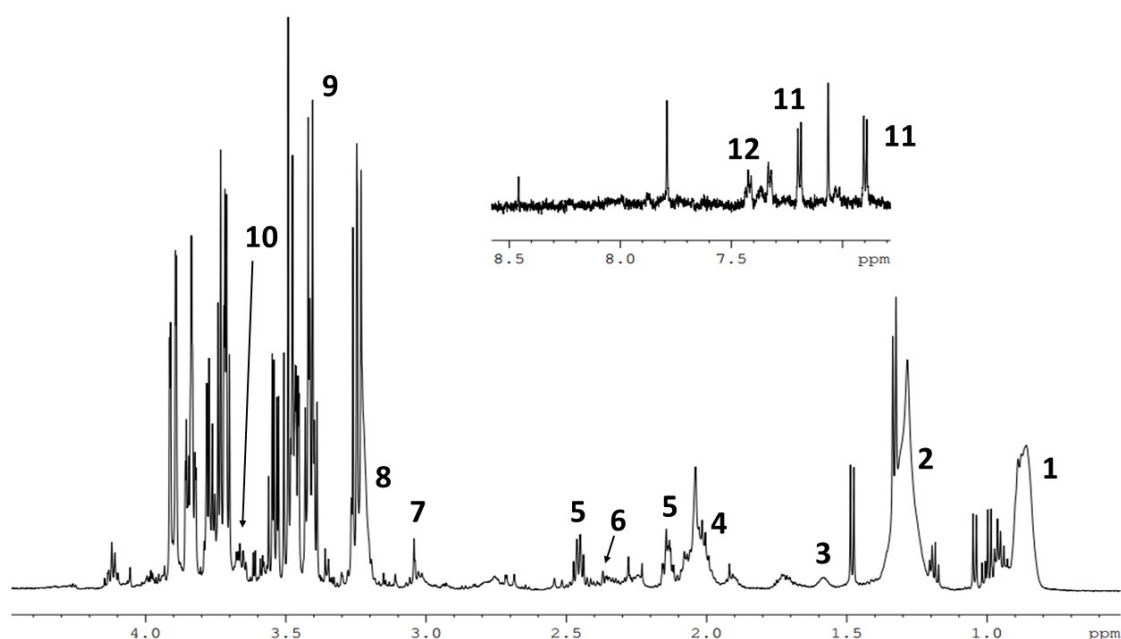

**Figure S3.** Examples of  $^1\text{H-NMR}$  spectral data (0.50 to 4.50 ppm) from serum from individuals living with HIV. The spectra were acquired on the Bruker AVANCE III 600 MHz at 25 °C, by a  $^1\text{H-NMR}$  pulse sequence with a  $T_2$  filter (cpmgrp1d). The numbers indicate the metabolites indicated as biomarkers in this study: 1,  $\text{CH}_3$  from lipids (LDL, and VLDL); 2,  $\text{CH}_2$  from lipids; 3, lysine; 4, glutamate; 5, glutamine; 6, pyruvate; 7, creatine; 8, choline; 9, glucose; 10, threonine; 11, tyrosine; 12, phenylalanine.

**Table S3.** Chemical shifts, spectral peaks' multiplicities, and coupling constants of some of the most important biomarkers (1-12) as depicted in Figure S3

| Metabolite                 | N <sup>o</sup> | Chemical shift (ppm), spectral peaks multiplicities and coupling constant |
|----------------------------|----------------|---------------------------------------------------------------------------|
| Lipids ( $-\text{CH}_3$ )  | 1              | 0.83 m                                                                    |
| Lipids ( $-\text{CH}_2-$ ) | 2              | 1.28 m                                                                    |
| Lysine                     | 3              | 1.46 m; 1.71 m; 1.89 m; 3.02 t; 3.74 t ( $J = 6.09$ Hz)                   |
| Glutamate                  | 4              | 2.04 m; 2.12 m; 2.34 m; 3.75 dd ( $J = 7.19, 4.72$ Hz)                    |
| Glutamine                  | 5              | 2.13 m; 2.45 m; 3.77 t ( $J = 6.18$ Hz)                                   |

|                      |    |                                                                                                                                                                                      |
|----------------------|----|--------------------------------------------------------------------------------------------------------------------------------------------------------------------------------------|
| <b>Pyruvate</b>      | 6  | 2.36 s                                                                                                                                                                               |
| <b>Creatine</b>      | 7  | 3.02 s; 3.92 s                                                                                                                                                                       |
| <b>Choline</b>       | 8  | 3.19 s; 3.51 dd ( $J = 5.82, 4.16$ Hz); 4.06 ddd                                                                                                                                     |
| <b>Glucose</b>       | 9  | 3.23 dd ( $J = 9.41, 7.98$ Hz); 3.40 m; 3.46 m;<br>3.52 dd ( $J = 9.82, 3.77$ ); 3.73 m; 3.82 m; 3.88<br>dd ( $J = 12.30, 2.23$ Hz); 4.63 d ( $J = 7.98$ );<br>5.22 d ( $J = 3.80$ ) |
| <b>Threonine</b>     | 10 | 1.33 d ( $J = 5.95$ Hz); 3.66 d ( $J = 6.05$ Hz);<br>4.30 m                                                                                                                          |
| <b>Tyrosine</b>      | 11 | 3.03 dd ( $J = 14.55, 8.01$ Hz); 3.34 dd ( $J =$<br>14.53, 4.68 Hz); 4.04 dd ( $J = 8.03, 4.68$ Hz);<br>6.94 m; 7.20 dd ( $J = 7.95, 1.51$ Hz); 7.24 td<br>( $J = 7.76, 1.71$ Hz)    |
| <b>Phenylalanine</b> | 12 | 3.19 m; 3.98 dd ( $J = 7.88, 5.31$ Hz); 7.32 d ( $J$<br>$= 6.96$ Hz); 7.34 m; 7.42 m                                                                                                 |

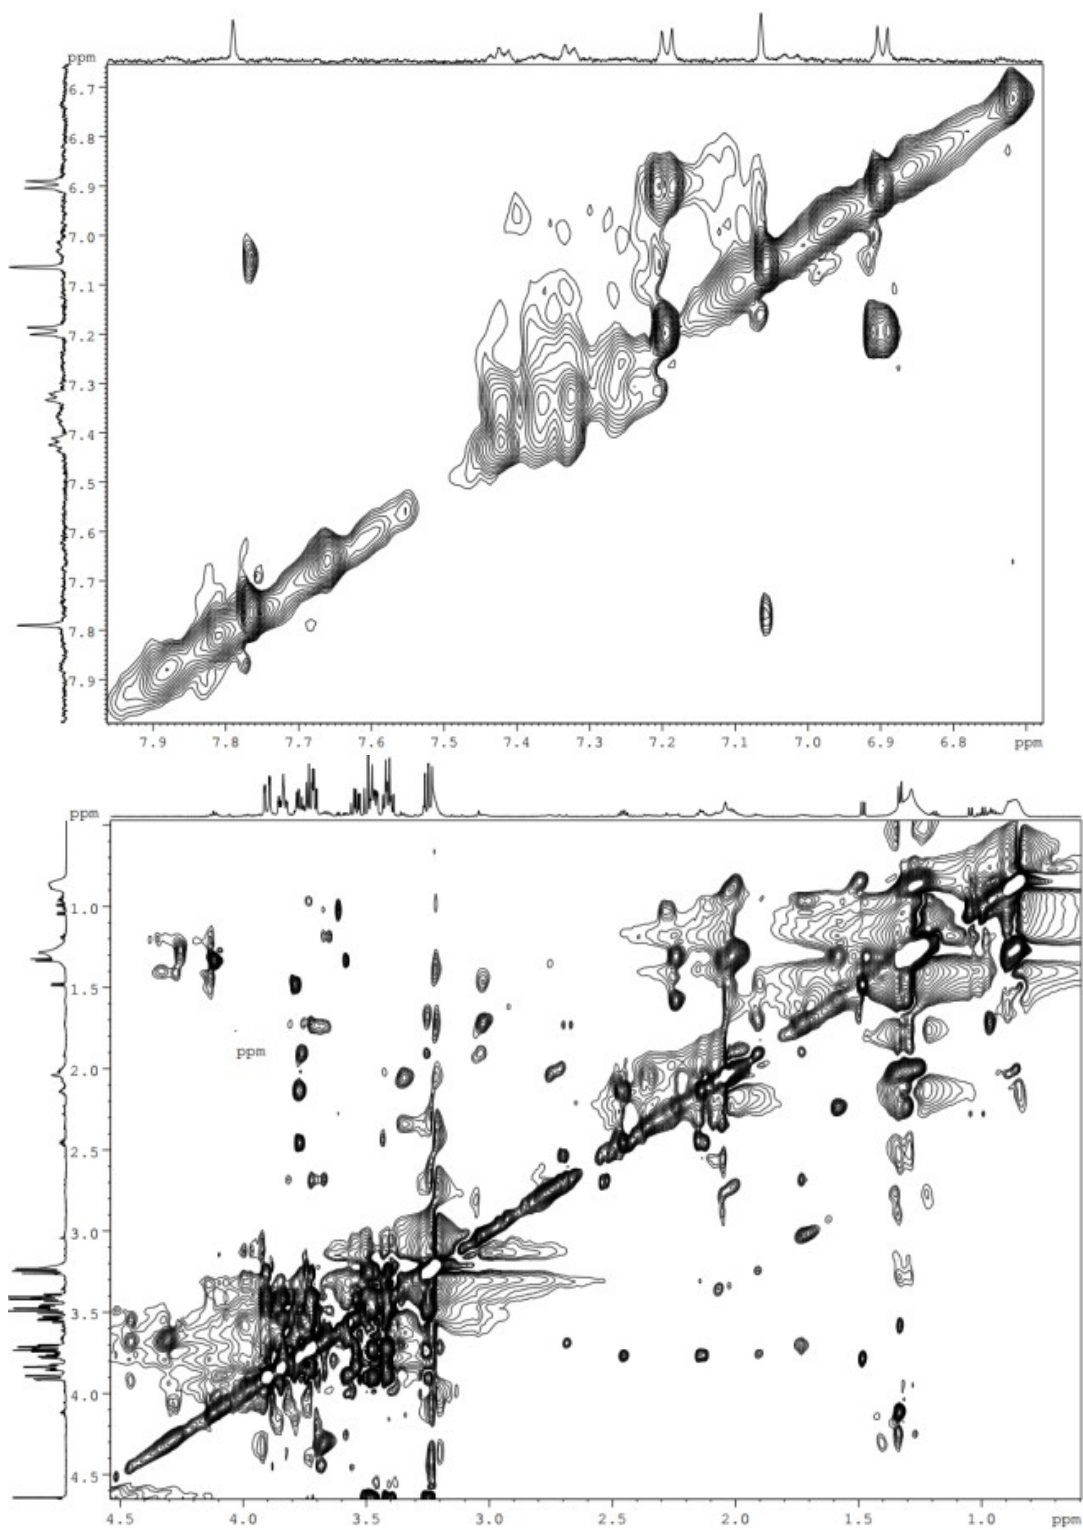

**Figure S4.**  $^1\text{H}$ - $^1\text{H}$  NMR TOCSY of a sample from the HIV cohort. The spectrum was acquired on the Bruker AVANCE III 600 MHz at 25 °C. On the bottom is shown the aliphatic spectral region (0.50 to 4.50 ppm), and on the upper panel is shown the aromatic spectral region.

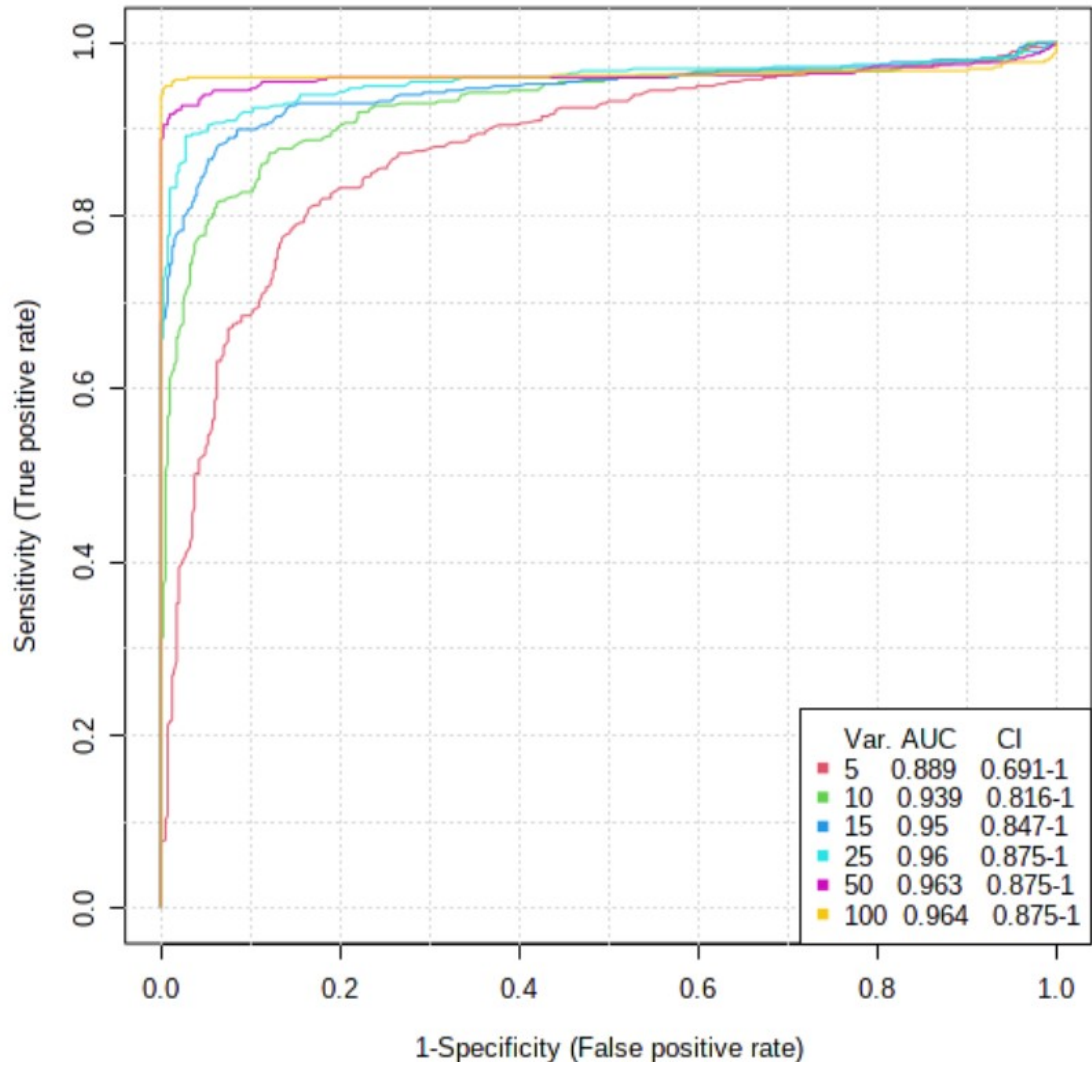

**Figure S5.** Comparisons of differential metabolites between patients (P) and control donors (C) based on multivariate ROC curve analysis. Var. (variables) indicate the number of selected features.



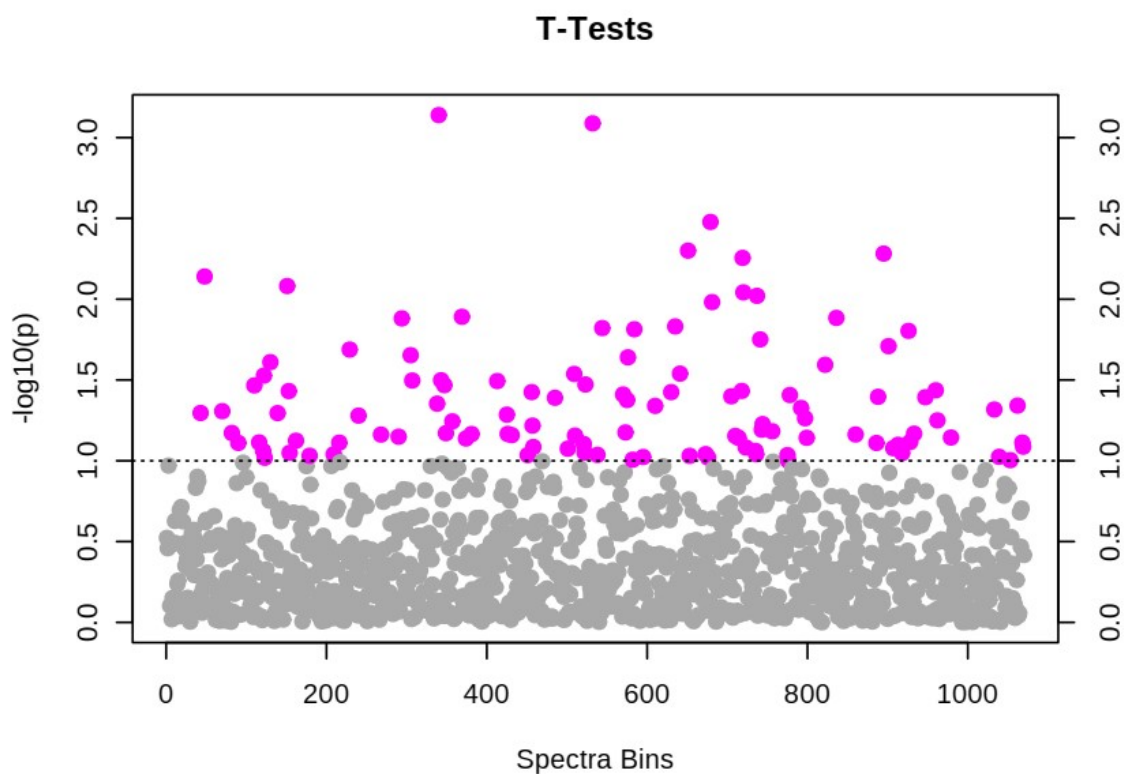

**Figure S6.** Important features selected by Univariate Analysis (t-tests) with threshold 0.1, which point to the most important  $^1\text{H-NMR}$  CPMG features of cohort before (BT), and after EG administration (AT).

**Table S4.** Important metabolites selected by Univariate Analysis (t-tests, identified as the lowest p-value metabolites in the  $^1\text{H-NMR}$  CPMG data, patients before (BT), and after administration (AT) of EG

| Name                 | t.stat  | p.value | $-\log_{10}(p)$ | FDR     |
|----------------------|---------|---------|-----------------|---------|
| Tyrosine             | 2.7389  | 0.00887 | 2.0522          | 0.72673 |
| Threonine            | -2.9655 | 0.00487 | 2.3127          | 0.59094 |
| Phenylalanine        | -2.9577 | 0.00497 | 2.3036          | 0.59094 |
| Lysine               | -2.9790 | 0.00469 | 2.3285          | 0.59094 |
| Lactate              | 2.7221  | 0.00926 | 2.0333          | 0.72673 |
| Glutamine            | 3.0391  | 0.00398 | 2.3997          | 0.59094 |
| Glucose              | -3.3415 | 0.00171 | 2.7677          | 0.59094 |
| Creatine             | -2.6598 | 0.01087 | 1.9639          | 0.72673 |
| $\text{CH}_2$ lipids | -2.4923 | 0.01653 | 1.7817          | 0.80588 |

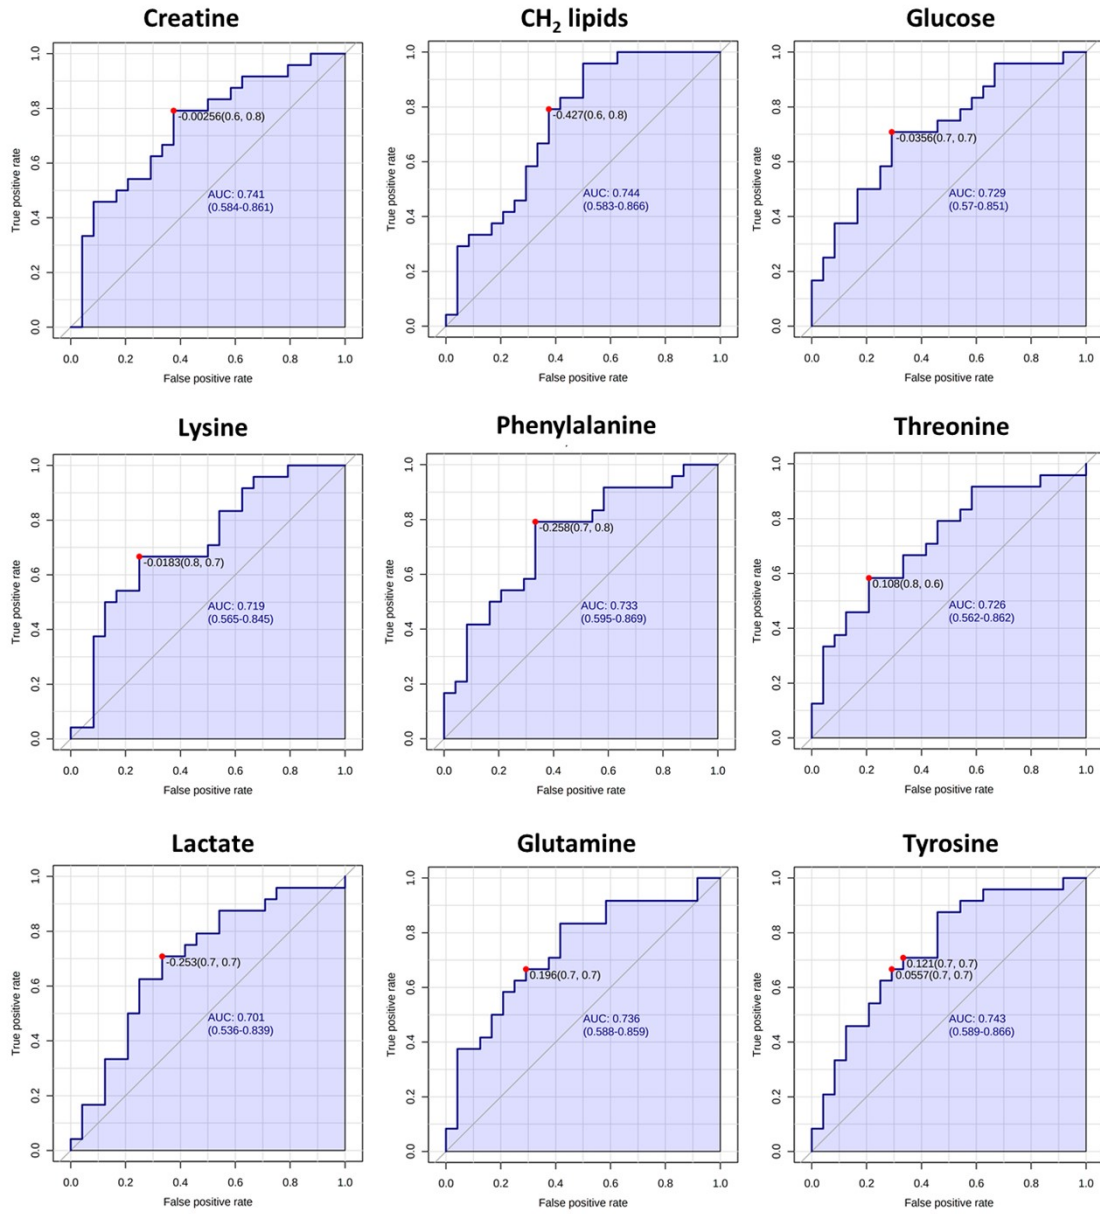

**Figure S7.** Univariate ROC curve analysis was performed on biomarkers identified as discriminatory for HIV patients before and after 30 days of treatment.
